# Supplementary material
Source: publisher site journal article supplement (https://www.spandidos-publications.com/8670/downloadSupplementary)

Figure S1. CONSORT flowchart: A CONSORT flow diagram is presented describing participant enrollment, allocation, follow-up and analysis of the patients in the present study.

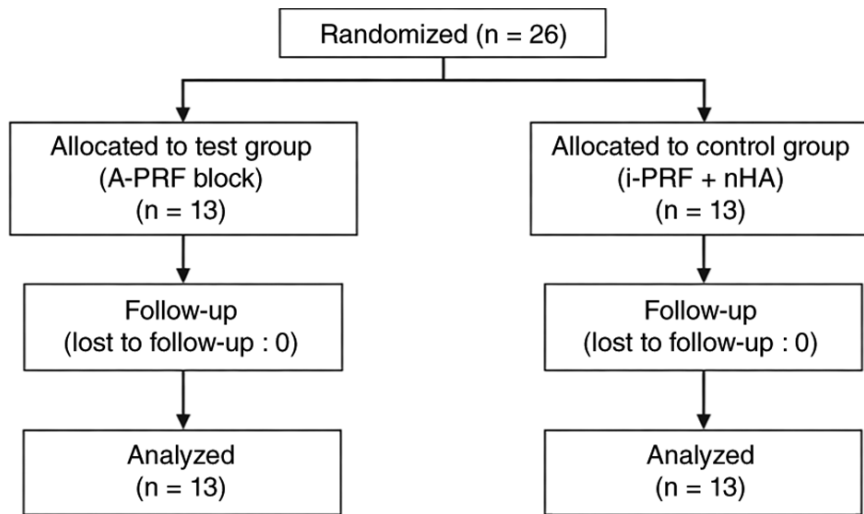

Figure S2. Customized acrylic stent showing orientation grooves used for standardized and reproducible relative clinical attachment level measurements throughout the study.

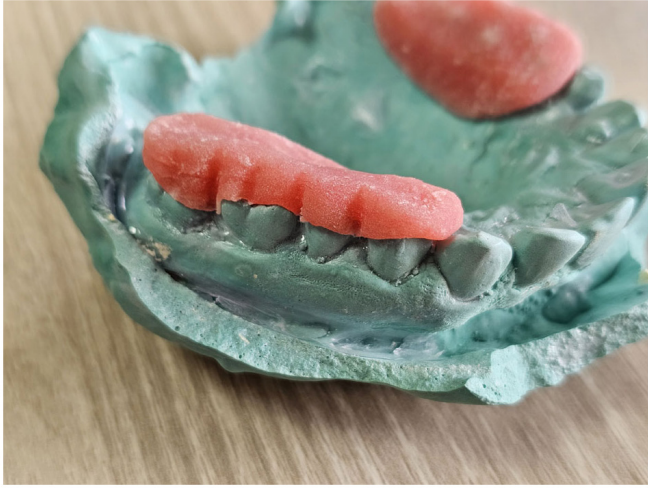

Supplement: Supplementary file 1 [file downloadSupplementary]
